# Supplementary material for: Systematic rare variant analyses identify RAB32 as a susceptibility gene for familial Parkinson’s disease
Source: PubMed Central journal article supplement (PMC11250361; doi:10.1038/s41588-024-01787-7), 2024-06-10
Supplement: 41588_2024_1787_MOESM1_ESM.pdf [file 41588_2024_1787_MOESM1_ESM.pdf]

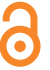

---

# Systematic rare variant analyses identify *RAB32* as a susceptibility gene for familial Parkinson's disease

---

In the format provided by the authors and unedited

---

# Table of Contents

|                             |    |
|-----------------------------|----|
| Table of Contents .....     | 1  |
| Supplementary Tables .....  | 2  |
| Supplementary Figures ..... | 3  |
| Supplementary Note.....     | 5  |
| Case reports .....          | 5  |
| Consortium authors .....    | 10 |

## Supplementary Tables

**Supplementary Table 1.** PCR and sequencing primers used for validation of the *RAB32* p.S71R variant.

| <b>PCR primers</b>            | <b>Sequence</b>       |
|-------------------------------|-----------------------|
| RAB32-exon1-Forward           | ACCTCTTCAAGGTGCTGGTG  |
| RAB32-exon1-Reverse           | CCTGCTCCAACCTCCTACTGC |
| RAB32-exon1a-Forward          | CTCTTCTCCCAGCACTACCG  |
| RAB32-exon1a-Reverse          | GGATTGGGCCTCTCTTCT    |
|                               |                       |
| <b>M13 Sequencing Primers</b> |                       |
| All reactions-Forward         | AGTAAAACGACGGCCAGT    |
| All reactions-Reverse         | GCAGGAAACAGCTATGACC   |
|                               |                       |

**Supplementary Table 2.** PCR and sequencing primers used for validation of the *SNAPC1* c.1073-2A>T variant.

| <b>PCR primers</b>            | <b>Sequence</b>      |
|-------------------------------|----------------------|
| SNAPC1-forward                | GCACCTGGCCGATAGTATGT |
| SNAPC1-reverse                | CTGGCAGTCTTCCTGTTCAA |
|                               |                      |
| <b>M13 Sequencing Primers</b> |                      |
| All reactions-Forward         | agtaaaacgacggccagt   |
| All reactions-Reverse         | gcaggaaacagctatgacc  |

# Supplementary Figures

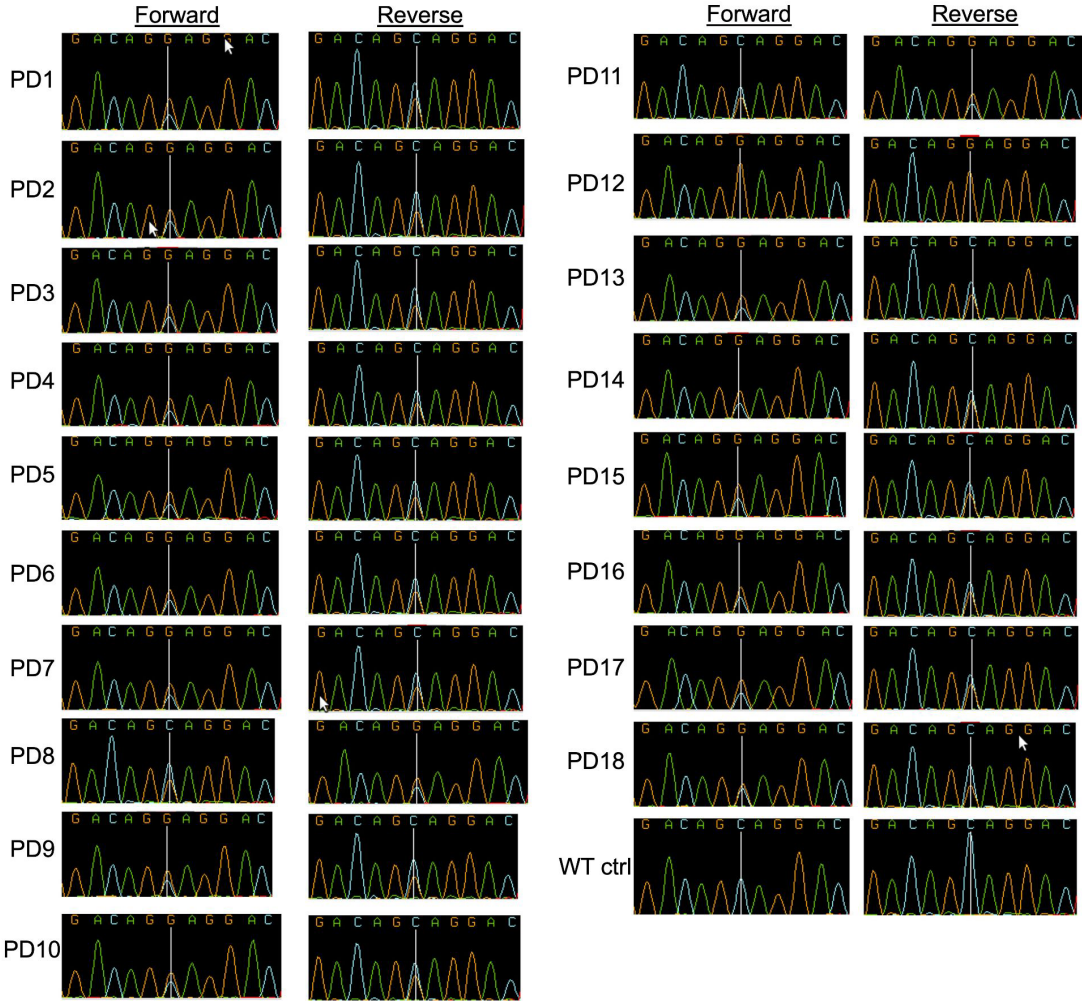

**Supplementary Figure 1. Sanger sequencing of 18 *RAB32* p.S71R carriers and 1 WT control.** Primers are listed in Supplementary Table 1.

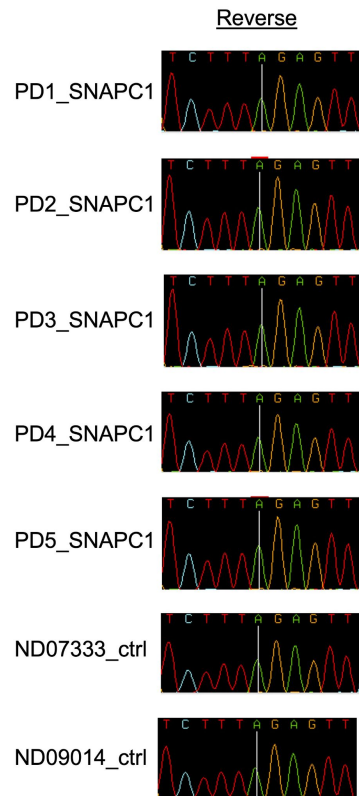

**Supplementary Figure 2. Sanger sequencing of the *SNAPC1* c.1073-2A>T variant.** Primers are listed in Supplementary Table 2.

# Supplementary Note

## Case reports

### **Patient 10**

In her medical history, this patient had diabetes, uveitis, and hypertension.

The PD symptoms began at the age of 62, characterized by a right resting tremor along with depression and hyposmia. Treatment with L-DOPA started a year later, followed by dopamine-agonist therapy 3 years afterward, which showed a positive response. Six years into the disease, she started experiencing freezing of gait (FOG), falls, and non-motor symptoms such as constipation and rapid eye movement sleep behavior disorder (RBD). After 7 years, dysautonomic symptoms, including urge incontinence, emerged. Motor fluctuations and dyskinesias appeared after a decade, and dysphagia developed after 12 years, leading to relapses and aspiration pneumonia. Hallucinations manifested 14 years into the PD. Ultimately, she passed away from an ischemic stroke after 16 years of battling PD at the age of 78.

A brain MRI conducted a decade after the onset of the disease revealed chronic vasculopathy and an ischemic stroke in the left nucleo-capsular region.

As for her family: her mother was affected by PD, and passed away at the age of 82. Additionally, one uncle experienced parkinsonism.

### **Patient 11**

In her medical history, this patient had rheumatic polymyalgia, hypertension, diabetes, and Hashimoto's thyroiditis. Additionally, a few years before the onset of PD, she experienced hyposmia and depression.

PD emerged at the age of 70, marked by bilateral bradykinesia. She initiated treatment with dopamine agonists and L-DOPA, which yielded a positive response but also resulted in mild impulsive control disorders (ICD). Motor fluctuations and dyskinesias arose after 5 years, necessitating treatment with ICOMT (entacapone).

After another 5 years, a brain MRI revealed moderate cortical fronto-parietal bilateral atrophy and mild subcortical atrophy, while a DATSCAN showed severe asymmetric (right to left) dopaminergic striatal uptake reduction.

The last neurological examination, conducted 9 years after the onset, indicated dysautonomic dysfunction (constipation, urge incontinence, hypotension), falls, and dysphagia.

The patient passed away 19 years after the onset of PD at the age of 89, the cause of death remaining unknown.

As for her family: her mother and one brother affected by PD (no other news on family).

### **Patient 12**

In his medical history, this patient had a gastric ulcer and lung cancer.

The onset of PD occurred at the age of 62, characterized by a right resting tremor and micrographia. Treatment with L-DOPA commenced a year later, followed by dopamine agonist therapy 2 years afterward, which yielded a positive response. Motor fluctuations and dyskinesias emerged 9 years after the onset, with falls and mild cognitive impairment appearing after 10 and 11 years, respectively.

The patient passed away 12 years after the onset of PD at the age of 74, the cause of death remaining unknown.

As for his family: the mother was affected by uncertain parkinsonism.

### **Patient 13**

In his medical history, this patient experienced only hyposmia. PD onset occurred at the age of 42, marked by a left resting tremor and bradykinesia.

Dopamine agonists were initially used as the first-line treatment, leading to mild ICD. After 3 years, L-DOPA was added with an excellent response. Motor fluctuations and dyskinesias emerged 4 years after the onset and progressively worsened over the course of ten years.

Due to the worsening symptoms, 3 years later, the patient underwent deep brain stimulation (DBS) without any pathological findings on brain MRI and CT-PET. The procedure resulted in remarkable motor improvement and a significant reduction in dopamine replacement therapy. However, the patient experienced worsened ICD and

impulsivity, culminating in an attempted suicide. As a result, antipsychotic drugs were incorporated into the therapy regimen.

Motor benefits have been maintained up to the present, although there has been a mild onset of FOG 4 years post-DBS, along with mild camptocormia affecting posture.

As for his family: his father was affected by PD.

#### **Patient 14**

In his family history, there is a record of prostatic cancer and hypertension. Parkinson's disease (PD) onset was observed at the age of 65, characterized by right bradykinesia. Two years later, he initiated dopamine agonist therapy, followed by the introduction of L-DOPA treatment, which showed a positive response.

Unfortunately, we lack any further neurological evaluations beyond the last one conducted in 2002.

No familiarity for PD.

#### **Patient 15**

In his medical history, this patient had Hashimoto's thyroiditis. Parkinson's disease (PD) onset was observed at the age of 70, marked by deteriorating walking, postural deficits, and falls. He commenced L-DOPA treatment, which showed a positive response.

Two years later, hallucinations and dysautonomic dysfunctions emerged, prompting his admission to our ward for further evaluation. Tests including DATSCAN exam (revealing bilateral dopaminergic putaminal and caudate uptake reduction), CT-PET (showing bilateral central gyrus uptake reduction), and neuropsychological examination (which returned normal results) were conducted.

Our most recent neurological evaluation dates back to 2012.

As for his family: one out of 4 sisters was affected by PD.

#### **Patient 16**



The onset of PD occurred in this male patient at the age of 54, characterized by left bradykinesia. Treatment with L-DOPA commenced a year later, followed by dopamine-agonist therapy 5 years afterward, resulting in a positive response.

Motor fluctuations and dyskinesias manifested 5 years after the onset, followed by the emergence of FOG, falls, and postural instability a few months later. There were no reports of dementia or hallucinations.

Throughout the course of PD, he also battled multiple myeloma, which was managed with chemotherapy and bone marrow auto-graft, along with prostate cancer.

The patient passed away 12 years after the onset of PD due to myeloma recurrence.

As for his family: one uncle from father's side suffered from PD.

### **Patient 17**

The onset of PD in this male patient occurred at the age of 39, characterized by a right resting tremor. There were no reported symptoms of depression or hyposmia.

Treatment with dopamine agonist commenced one year later, followed by subsequent therapy with L-DOPA. Motor fluctuations appeared 5 years after the onset of PD. Throughout the years of the disease, he also experienced ICD.

Our most recent neurological evaluation took place in 2009.

As for his family: one grand mother from mother side suffered from PD.

### **Patient 18**

This 61-year-old Mayo Clinic female patient developed her first symptoms of dominant right-hand tremor a year earlier. She was last seen at the Mayo Clinic two years later at age 63. Phenotype was of classic PD, tremor predominant subtype with good response to low dose of levodopa in combination with low dose of amantadine and rasagiline. Over the period of two-year observation, she tolerated her therapy well without dyskinesias, fluctuations in motor performance, on and off symptoms, or dystonia. Three years into her illness, she was fully independent bothered only by intermittent rest

tremor in her right hand. On examination she had all features of PD, rest tremor, bradykinesia, and rigidity predominantly affecting her right, dominant side. No balance troubles. The non-motor symptoms included difficulties with nocturnal sleep that was disturbed by frequent awakenings but no features that would be consistent with REM-sleep behavior disorder (polysomnography was not done and melatonin was offered). She also reported leg paresthesias that were responded to low dose of gabapentin. EMG was normal. Brain MRI done a year after the symptomatic disease onset was normal. DaT scan was done about six months into the illness and demonstrated an asymmetrical basal ganglia tracer uptake worse on the left side supported the diagnosis of PD. Her uncle was diagnosed with Parkinson's disease at age 85. Apparently died at age 93. She has no children. She denies history of head trauma, encephalitis, meningitis, or exposure to industrial toxins. Her other illnesses include chronic low back pain since age 57. She also reported some anxiety for which she was taken Xanax on as needed basis only. In the past she was diagnosed with fibromyalgia requiring treatment with tramadol also on as needed basis. She used to work as an office employee. She smoked Tabaco for 25 years but quit about 15 years prior to seen at the Mayo Clinic. She denied alcohol consumption.

## Consortium authors

### **Project MinE ALS Sequencing Consortium**

Philip Van Damme<sup>15,16,17</sup>, Philippe Corcia<sup>18,19,20</sup>, Philippe Couratier<sup>21</sup>, Orla Hardiman<sup>22,23</sup>, Russell L. McLaughlin<sup>24</sup>, Marc Gotkine<sup>25</sup>, Vivian Drory<sup>26</sup>, Nicola Ticozzi<sup>12,13</sup>, Vincenzo Silani<sup>27,28</sup>, Jan H. Veldink<sup>2</sup>, Leonard H. van den Berg<sup>2</sup>, Mamede de Carvalho<sup>29,30</sup>, Marta Gromicho<sup>29</sup>, Jesus S. Mora<sup>31</sup>, Monica Povedano<sup>32</sup>, Peter M. Andersen<sup>33</sup>, Markus Weber<sup>34</sup>, A. Nazli Başak<sup>35</sup>, Ammar Al-Chalabi<sup>36,37</sup>, Christopher E. Shaw<sup>36</sup>, Pamela J. Shaw<sup>38</sup>, Karen E. Morrison<sup>39</sup>, Clifton L. Dalgard<sup>40</sup>, John E. Landers<sup>4</sup>, Jonathan D. Glass<sup>41,42</sup>

15: KU Leuven - University of Leuven, Department of Neurosciences, Experimental Neurology, B-3000 Leuven, Belgium.

16: VIB, Center for Brain & Disease Research, Laboratory of Neurobiology, Leuven, Belgium.

17: University Hospitals Leuven, Department of Neurology, Leuven, Belgium.

18: Centre SLA, CHRU de Tours, Tours, France.

19: Federation des Centres SLA Tours and Limoges, LITORALS, Tours, France.

20: UMR 1253, iBrain, Université de Tours, Inserm, Tours, France.

21: Centre de Référence SLA et autres maladies du neurone moteur, CHRU Limoges, Limoges, France.

22: Academic Unit of Neurology, Trinity College Dublin, Trinity Biomedical Sciences Institute, Dublin, Republic of Ireland.

23: Department of Neurology, Beaumont Hospital, Dublin, Republic of Ireland.

24: Complex Trait Genomics Laboratory, Smurfit Institute of Genetics, Trinity College Dublin, Dublin, Republic of Ireland.

25: Neuromuscular/EMG service and ALS/Motor Neuron Disease Clinic, Hebrew University-Hadassah Medical Center, Jerusalem, Israel

26: Neuromuscular Diseases Unit, Department of Neurology, Tel Aviv Sourasky Medical Center, Sackler Faculty of Medicine, Tel-Aviv University, Tel-Aviv, Israel

27: Department of Neurology and Laboratory of Neuroscience, IRCCS Istituto Auxologico Italiano, Milano, Italy.

28: Department of Pathophysiology and Transplantation, 'Dino Ferrari' Center, Università degli Studi di Milano, Milano, Italy.

29: Instituto de Fisiologia, Instituto de Medicina Molecular, Faculdade de Medicina, Universidade de Lisboa, Lisbon, Portugal

- 30: Department of Neurosciences, Hospital de Santa Maria-CHLN, Lisbon, Portugal.
- 31: ALS Unit, Hospital San Rafael, Madrid 28016, Spain.
- 32: la Unitat Funcional de Motoneurona, Cap de Secció de Neurofisiologia, Servei de Neurologia, Hospital Universitario de Bellvitge-IDIBELL, Spain
- 33: Department of Clinical Science, Neurosciences, Umeå University, Umeå, Sweden.
- 34: Neuromuscular Diseases Unit/ALS Clinic, Kantonsspital St. Gallen, 9007, St. Gallen, Switzerland.
- 35: Koç University, School of Medicine, KUTTAM-NDAL, Istanbul Turkey.
- 36: King's College London, Maurice Wohl Clinical Neuroscience Institute, Institute of Psychiatry, Psychology & Neuroscience, De Crespigny Park, London, SE5 8AF, United Kingdom.
- 37: King's College Hospital, Denmark Hill, London, SE5 9RS, United Kingdom.
- 38: Sheffield Institute for Translational Neuroscience (SITraN), University of Sheffield, Sheffield S10 2HQ, UK.
- 39: Faculty of Medicine, University of Southampton, Southampton SO17 1BJ, UK.
- 40: Department of Anatomy, Physiology and Genetics, School of Medicine, Uniformed Services University of the Health Sciences, Bethesda, MD 20814, USA
- 41: Department Neurology, Emory University School of Medicine, Atlanta, GA 30322, USA
- 42: Emory ALS Center, Emory University School of Medicine, Atlanta, GA, USA.

### **NYGC ALS Consortium**

Hemali Phatnani<sup>43</sup>, Justin Kwan<sup>44,45</sup>, Dhruv Sareen<sup>46</sup>, James R. Broach<sup>47</sup>, Zachary Simmons<sup>48</sup>, Ximena Arcila-Londono<sup>49</sup>, Edward B. Lee<sup>50</sup>, Vivianna M. Deerlin<sup>50</sup>, Neil A. Shneider<sup>51</sup>, Ernest Fraenkel<sup>52</sup>, Lyle W. Ostrow<sup>53</sup>, Frank Baas<sup>54</sup>, Noah Zaitlen<sup>55</sup>, James D. Berry<sup>56</sup>, Andrea Malaspina<sup>57</sup>, Pietro Fratta<sup>58</sup>, Gregory A. Cox<sup>59</sup>, Leslie M. Thompson<sup>60</sup>, Steve Finkbeiner<sup>61</sup>, Efthimios Dardiotis<sup>62</sup>, Timothy M. Miller<sup>63</sup>, Siddharthan Chandran<sup>64</sup>, Suvankar Pal<sup>64</sup>, Eran Hornstein<sup>65</sup>, Daniel J. MacGowan<sup>66</sup>, Terry Heiman-Patterson<sup>67</sup>, Molly G. Hammell<sup>68</sup>, Nikolaos. A. Patsopoulos<sup>69</sup>, Oleg Butovsky<sup>70</sup>, Joshua Dubnau<sup>71</sup>, Avindra Nath<sup>72</sup>, Robert Bowser<sup>73</sup>, Matthew Harms<sup>74</sup>, Eleonora Aronica<sup>75</sup>, Mary Poss<sup>76</sup>, Jennifer Phillips-Cremins<sup>77</sup>, John Crary<sup>78</sup>, Nazem Atassi<sup>79</sup>, Dale J. Lange<sup>80</sup>, Darius J. Adams<sup>81</sup>, Leonidas Stefanis<sup>82,83</sup>, Marc Gotkine<sup>25</sup>, Robert H. Baloh<sup>84,85</sup>, Suma Babu<sup>86</sup>, Towfique Raj<sup>87</sup>, Sabrina Paganoni<sup>88</sup>, Ophir Shalem<sup>89,90</sup>, Colin Smith<sup>91,92</sup>, Bin Zhang<sup>93</sup>, Thomas Blanchard<sup>45</sup>, Brent Harris<sup>94</sup>, Iris Broce<sup>95</sup>, Vivian Drory<sup>26</sup>, John

Ravits<sup>96</sup>, Corey McMillan<sup>97</sup>, Vilas Menon<sup>98</sup>, Lani Wu<sup>99</sup>, Steven Altschuler<sup>99</sup>, Yossef Lerner<sup>100</sup>, Rita Sattler<sup>101</sup>, Kendall Van Keuren-Jensen<sup>102</sup>, Orit Rozenblatt-Rosen<sup>103</sup>, Kerstin Lindblad-Toh<sup>103</sup>, Katharine Nicholson<sup>104</sup>, Peter Gregersen<sup>105</sup>, Jeong-Ho Lee<sup>106</sup>, Matt Brauer<sup>107</sup>, Tara Nickerson<sup>107</sup>, Shameek Biswas<sup>108</sup>, Kimberly A Wilson<sup>108</sup>, Sulev Koks<sup>109</sup>, Stephen Muljo<sup>110</sup>, Bryan J. Traynor<sup>111</sup>, Robert Moccia<sup>112</sup>, Seng Cheng<sup>112</sup>, Andrew Deubler<sup>113</sup>, Giovanni Coppola<sup>113</sup>, Mickey Atwal<sup>113</sup>, Michael Cantor<sup>113</sup>, William Salerno<sup>113</sup>, Eli Stahl<sup>113</sup>, Matt Anderson<sup>113</sup>, David Friendwey<sup>113</sup>, Daphne Koller<sup>114</sup>, Mary Rozenman<sup>114</sup>

43: Center for Genomics of Neurodegenerative Disease (CGND), New York Genome Center, New York, NY

44: Department of Neurology, Lewis Katz School of Medicine, Temple University, Philadelphia, PA

45: University of Maryland Brain and Tissue Bank and NIH NeuroBioBank

46: Cedars-Sinai Department of Biomedical Sciences, Board of Governors Regenerative Medicine Institute and Brain Program, Cedars-Sinai Medical Center, and Department of Medicine, University of California, Los Angeles, CA

47: Department of Biochemistry and Molecular Biology, Penn State Institute for Personalized Medicine, The Pennsylvania State University, Hershey, PA

48: Department of Neurology, The Pennsylvania State University, Hershey, PA

49: Department of Neurology, Henry Ford Health System, Detroit, MI

50: Department of Pathology and Laboratory Medicine, Perelman School of Medicine, University of Pennsylvania, Philadelphia, PA

51: Department of Neurology, Center for Motor Neuron Biology and Disease, Institute for Genomic Medicine, Columbia University, New York, NY

52: Department of Biological Engineering, Massachusetts Institute of Technology, Cambridge, MA

53: Department of Neurology, Johns Hopkins School of Medicine, Baltimore, MD

54: Department of Neurogenetics, Academic Medical Centre, Amsterdam and Leiden University Medical Center, Leiden, The Netherlands

55: Department of Medicine, Lung Biology Center, University of California, San Francisco, CA

56: ALS Multidisciplinary Clinic, Neuromuscular Division, Department of Neurology, Harvard Medical School, and Neurological Clinical Research Institute, Massachusetts General Hospital, Boston, MA

57: Centre for Neuroscience and Trauma, Blizard Institute, Barts and The London School of

Medicine and Dentistry, Queen Mary University of London, London, and Department of Neurology, Basildon University Hospital, Basildon, United Kingdom

58: Institute of Neurology, National Hospital for Neurology and Neurosurgery, University College London, London, United Kingdom

59: The Jackson Laboratory, Bar Harbor, ME

60: Department of Psychiatry & Human Behavior, Department of Biological Chemistry, School of Medicine, and Department of Neurobiology and Behavior, School of Biological Sciences, University California, Irvine, CA

61: Taube/Koret Center for Neurodegenerative Disease Research, Roddenberry Center for Stem Cell Biology and Medicine, Gladstone Institute

62: Department of Neurology & Sensory Organs, University of Thessaly, Thessaly, Greece

63: Department of Neurology, Washington University in St. Louis, St. Louis, MO

64: Centre for Clinical Brain Sciences, Anne Rowling Regenerative Neurology Clinic, Euan MacDonald Centre for Motor Neurone Disease Research, University of Edinburgh, Edinburgh, United Kingdom

65: Department of Molecular Genetics, Weizmann Institute of Science, Rehovot, Israel

66: Department of Neurology, Icahn School of Medicine at Mount Sinai, New York, NY

67: Center for Neurodegenerative Disorders, Department of Neurology, the Lewis Katz School of Medicine, Temple University, Philadelphia, PA

68: Cold Spring Harbor Laboratory, Cold Spring Harbor, NY

69: Computer Science and Systems Biology Program, Ann Romney Center for Neurological Diseases, Department of Neurology and Division of Genetics in Department of Medicine, Brigham and Women's Hospital, Boston, MA, Harvard Medical School, Boston, MA, and Program in Medical and Population Genetics, Broad Institute, Cambridge, MA

70: Ann Romney Center for Neurologic Diseases, Brigham and Women's Hospital, Harvard Medical School, Boston, MA

71: Department of Anesthesiology, Stony Brook University, Stony Brook, NY

72: Section of Infections of the Nervous System, National Institute of Neurological Disorders and Stroke, NIH, Bethesda, MD

73: Department of Neurology, Barrow Neurological Institute, St. Joseph's Hospital and Medical Center, Department of Neurobiology, Barrow Neurological Institute, St. Joseph's Hospital and Medical Center, Phoenix, AZ

74: Department of Neurology, Division of Neuromuscular Medicine, Columbia University, New York, NY

- 75: Department of Neuropathology, Academic Medical Center, University of Amsterdam, Amsterdam, The Netherlands
- 76: Department of Biology and Veterinary and Biomedical Sciences, The Pennsylvania State University, University Park, PA
- 77: New York Stem Cell Foundation, Department of Bioengineering, School of Engineering and Applied Sciences, University of Pennsylvania, Philadelphia, PA
- 78: Department of Pathology, Fishberg Department of Neuroscience, Friedman Brain Institute, Ronald M. Loeb Center for Alzheimer's Disease, Icahn School of Medicine at Mount Sinai, New York, NY
- 79: Department of Neurology, Harvard Medical School, Neurological Clinical Research Institute, Massachusetts General Hospital, Boston, MA
- 80: Department of Neurology, Hospital for Special Surgery and Weill Cornell Medical Center, New York, NY
- 81: Medical Genetics, Atlantic Health System, Morristown Medical Center, Morristown, NJ, and Overlook Medical Center, Summit, NJ
- 82: Center of Clinical Research, Experimental Surgery and Translational Research, Biomedical Research Foundation of the Academy of Athens (BRFAA), 4 Soranou Efessiou Street, 11527, Athens, Greece
- 83: 1st Department of Neurology, Eginition Hospital, Medical School, National and Kapodistrian University of Athens, Athens, Greece
- 84: Board of Governors Regenerative Medicine Institute, Los Angeles, CA
- 85: Department of Neurology, Cedars-Sinai Medical Center, Los Angeles, CA
- 86: Neurological Clinical Research Institute, Massachusetts General Hospital, Boston, MA
- 87: Departments of Neuroscience, and Genetics and Genomic Sciences, Ronald M. Loeb Center for Alzheimer's disease, Icahn School of Medicine at Mount Sinai, New York, NY
- 88: Harvard Medical School, Department of Physical Medicine & Rehabilitation, Spaulding Rehabilitation Hospital, Boston, MA
- 89: Center for Cellular and Molecular Therapeutics, Children's Hospital of Philadelphia, Philadelphia, PA
- 90: Department of Genetics, Perelman School of Medicine, University of Pennsylvania, Philadelphia, PA
- 91: Centre for Clinical Brain Sciences, University of Edinburgh, Edinburgh, UK
- 92: Euan MacDonald Centre for Motor Neurone Disease Research, University of Edinburgh, Edinburgh, UK

93: Department of Genetics and Genomic Sciences, Icahn Institute of Data Science and Genomic Technology, Icahn School of Medicine at Mount Sinai, New York, NY

94: Department of Neuropathology, Georgetown Brain Bank, Georgetown Lombardi Comprehensive Cancer Center, Georgetown University Medical Center, Washington DC

95: Neuroradiology Section, Department of Radiology and Biomedical Imaging, University of California, San Francisco, San Francisco, CA

96: Department of Neuroscience, University of California San Diego, La Jolla, CA

97: Department of Neurology, University of Pennsylvania Perelman School of Medicine, Philadelphia, PA

98: Department of Neurology, Columbia University Medical Center, New York, NY

99: Department of Pharmaceutical Chemistry, University of California San Francisco, San Francisco, CA

100: Hadassah Hebrew University

101: Department of Translational Neuroscience, Barrow Neurological Institute, Phoenix, Arizona

102: The Translational Genomics Research Institute (TGen), Phoenix, Arizona

103: Broad Institute, Cambridge, Massachusetts

104: Massachusetts General Hospital, Boston, Massachusetts

105: Institute of Molecular Medicine, Feinstein Institutes for Medical Research, Northwell Health, Manhasset, New York

106: Korea Advanced Institute of Science and Technology (KAIST), Daejeon, South Korea

107: Maze Therapeutics

108: Bristol-Myers Squibb

109: Perron Institute for Neurological and Translational Science

110: Integrative Immunobiology Section, National Institute of Allergy and Infectious Disease, NIH

111: Neuromuscular Disease Research Section, National Institute of Aging

112: Pfizer

113: Regeneron

114: Insitro
