# Supplementary material for: Systematic rare variant analyses identify RAB32 as a susceptibility gene for familial Parkinson’s disease
Source: PubMed Central journal article supplement (PMC11250361; doi:10.1038/s41588-024-01787-7), 2024-06-10

# Main Figure 3

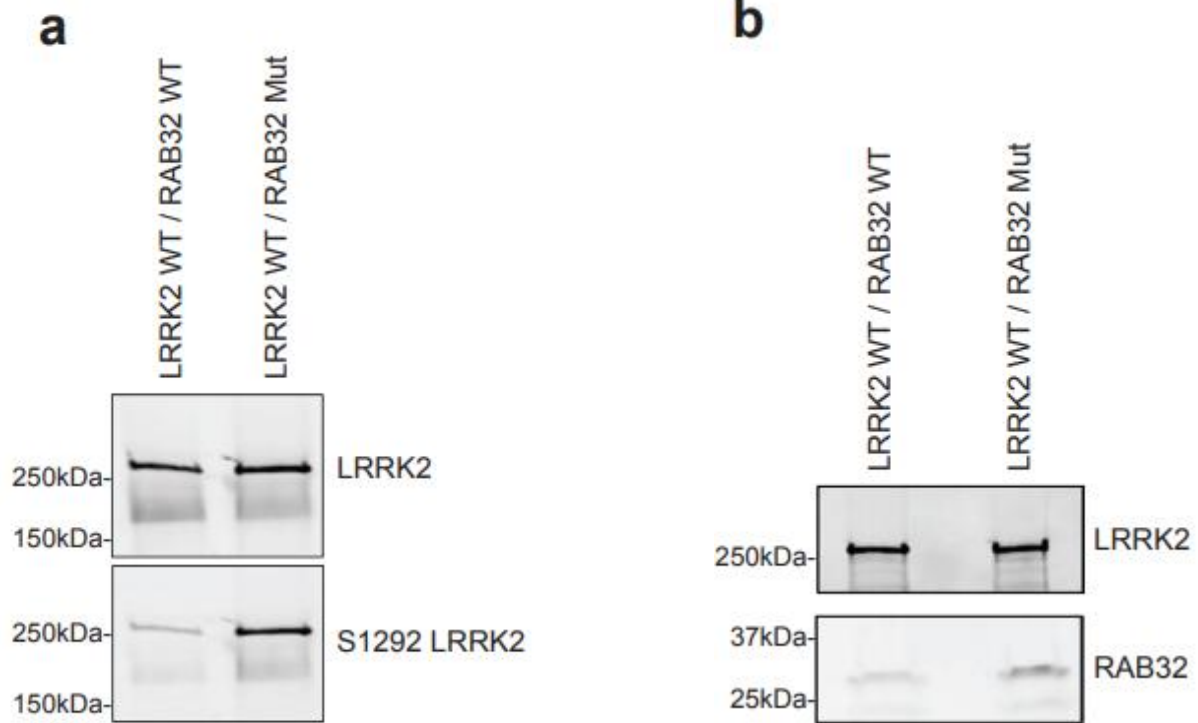

# Full Blots

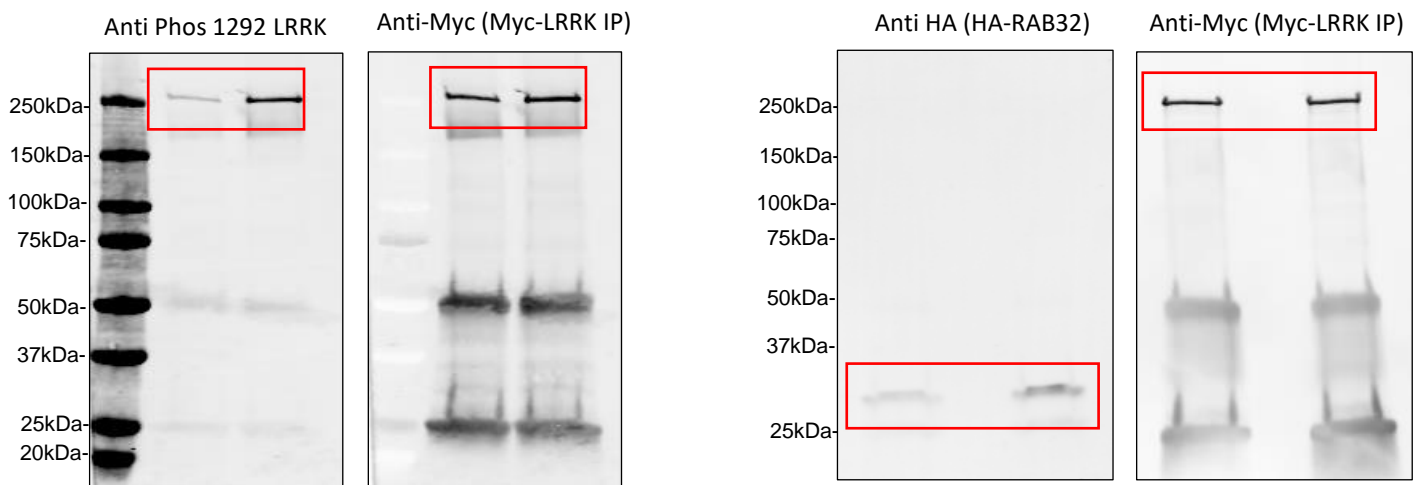

Supplement: 41588_2024_1787_MOESM5_ESM.pdf [file 41588_2024_1787_MOESM5_ESM.pdf]
