# Supplementary material for: Systematic rare variant analyses identify RAB32 as a susceptibility gene for familial Parkinson’s disease
Source: PubMed Central journal article supplement (PMC11250361; doi:10.1038/s41588-024-01787-7), 2024-06-10

# Extended Data Figure 9

# Full Blots

**a**

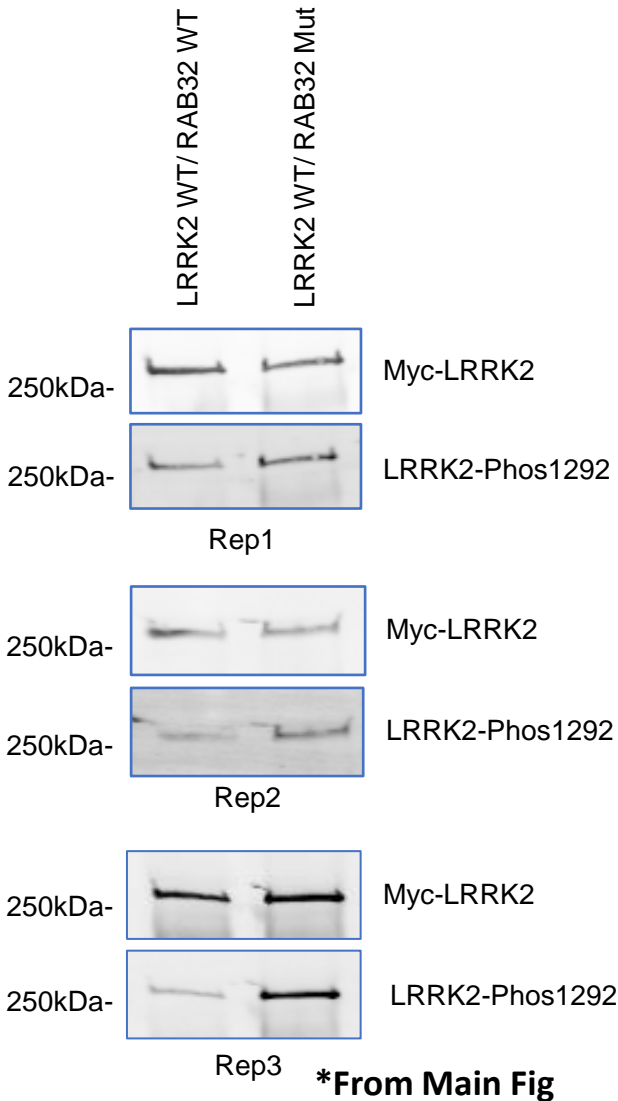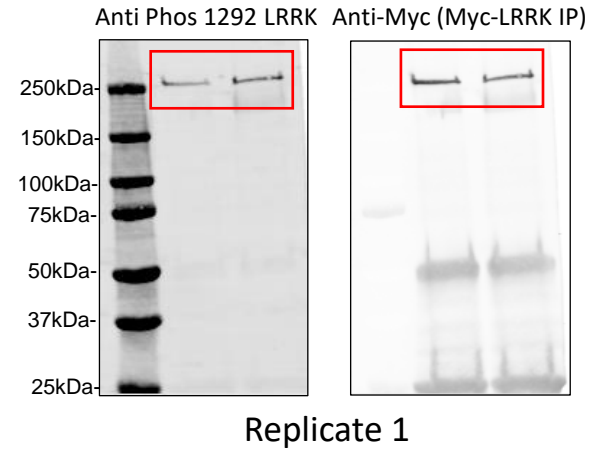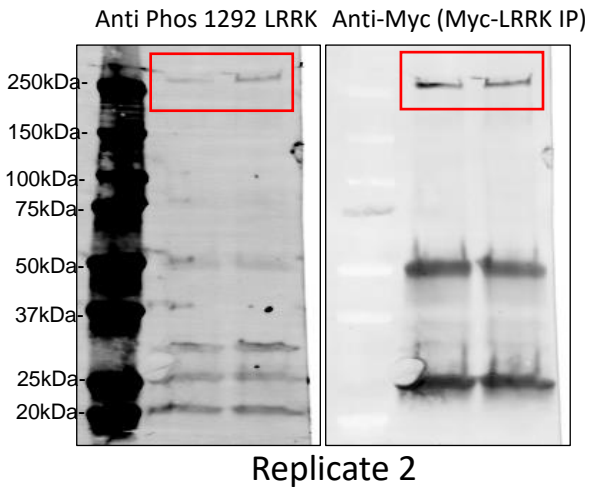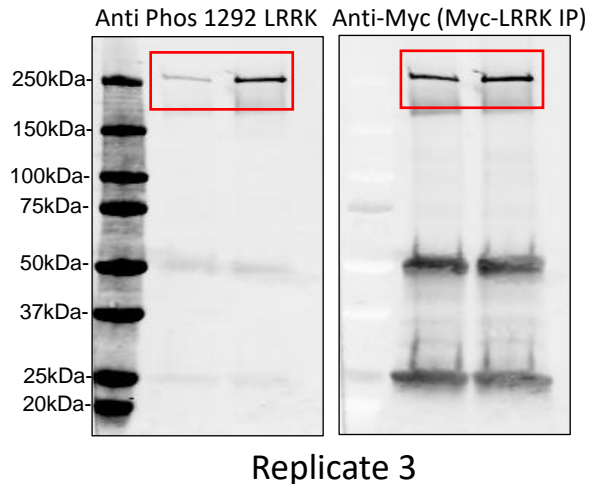

## Extended Data Figure 9

**b**

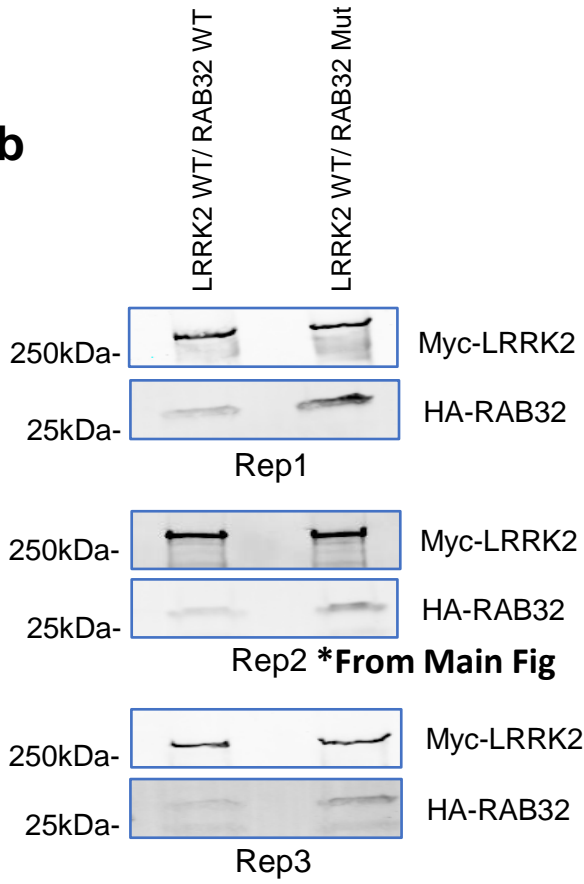

## Full Blots

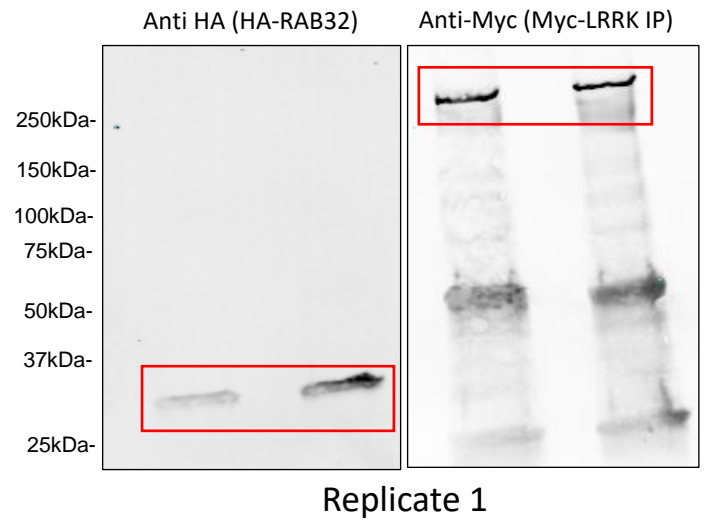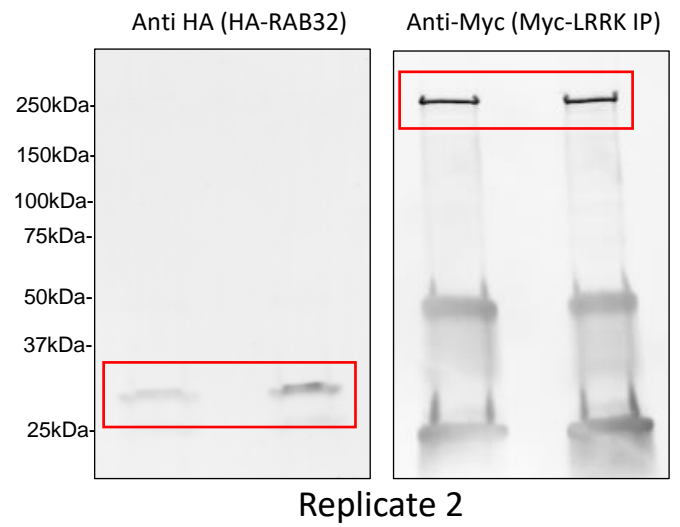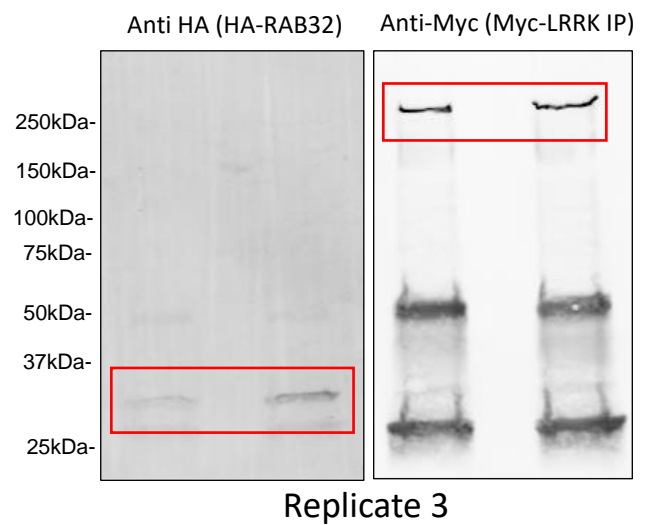

Supplement: 41588_2024_1787_MOESM6_ESM.pdf [file 41588_2024_1787_MOESM6_ESM.pdf]
